# Supplementary material for: Pediatric glioma histone H3.3 K27M/G34R mutations drive abnormalities in PML nuclear bodies
Source: PubMed Central journal article supplement (PMC10704828; doi:10.1186/s13059-023-03122-5), 2023-12-08
Supplement: 13059_2023_3122_MOESM2_ESM.pdf [file 13059_2023_3122_MOESM2_ESM.pdf]

**Table S1**

Primer sequences for PCR amplification and RT-qPCR

|       | Primer sequences for PCR amplification and RT-qPCR analysis |                              |
|-------|-------------------------------------------------------------|------------------------------|
| GFAP  | 5' GCAGAAGCTCCAGGATGAAA 3'                                  | 5' GCTTCATCTGCTTCCTGTCTAT 3' |
| GAPDH | 5' CGAGATCCCTCCAAAATCAA 3'                                  | 5' TTCACACCCATGACGAACAT 3'   |

**Table S2**

List of antibodies used

| Antibodies                                   | Source                            | Antibodies                                     | Source                                            |
|----------------------------------------------|-----------------------------------|------------------------------------------------|---------------------------------------------------|
| H3                                           | Abcam, ab1791                     | ATRX                                           | Santa Cruz Biotechnology, sc15408                 |
| H3.3                                         | Abcam, ab176840                   | DAXX                                           | Santa Cruz Biotechnology, sc-7152                 |
| H3K27M                                       | Abcam, ab190631                   | PML (for use in mouse cells)                   | Millipore, MAB3738                                |
| $\beta$ Actin (AC15)                         | Santa Cruz Biotechnology, sc6987  | PML (for use in human cells)                   | Abcam, ab179466 (ChIP, WB)<br>Abcam, ab96051 (IF) |
| dCas9 KRAB repressor                         | Abcam, ab191468                   | Myc (clone 9E10)                               | Sigma, M4439                                      |
| GFAP                                         | Cell Signalling Technology, 12389 | Flag tag (M2)                                  | Sigma, F3165                                      |
| Goat anti Rabbit IgG, HRP conjugate          | Merck Millipore, AP187P           | Donkey anti-Mouse IgG (H+L), Alexa Fluor 488   | Thermo Fisher Scientific, A-21202                 |
| Donkey anti-Mouse IgG, HRP conjugate         | Merck Millipore, AP192P           | Donkey anti-Rabbit IgG (H+L), Alexa Fluor 488  | Thermo Fisher Scientific, A-21206                 |
| Goat anti-mouse IgG (H+L) Alexa Fluor 647    | Thermo Fisher Scientific, A-32728 | Chicken anti-Rabbit IgG (H+L), Alexa Fluor 594 | Thermo Fisher Scientific, A-21442                 |
| Donkey anti-Mouse IgG (H+L), Alexa Fluor 594 | Thermo Fisher Scientific, A-21203 |                                                |                                                   |

**Table S3**

Primer sequences for sgRNA

|                          | Primer sequences for generating the constructs                     |
|--------------------------|--------------------------------------------------------------------|
| PML Knockdown sgRNA      | 5' tcccGTGAAGAGAAGCTGAAGGGG 3'<br>5' aaacCCCCTTCAGCTTCTCTTCAC 3'   |
| IDH1R132H knockout sgRNA | 5' caccgCATAGGTCATCATGCTTATG 3'<br>5' aaacCATAAGCATGATGACCTATGc 3' |
